# Supplementary material for: Pitfalls Associated with Discriminating Mixed-Species Biofilms by Flow Cytometry
Source: MDPI journal article supplement (doi:10.3390/antibiotics9110741), 2020-10-27
Supplement: s1 [file s1]

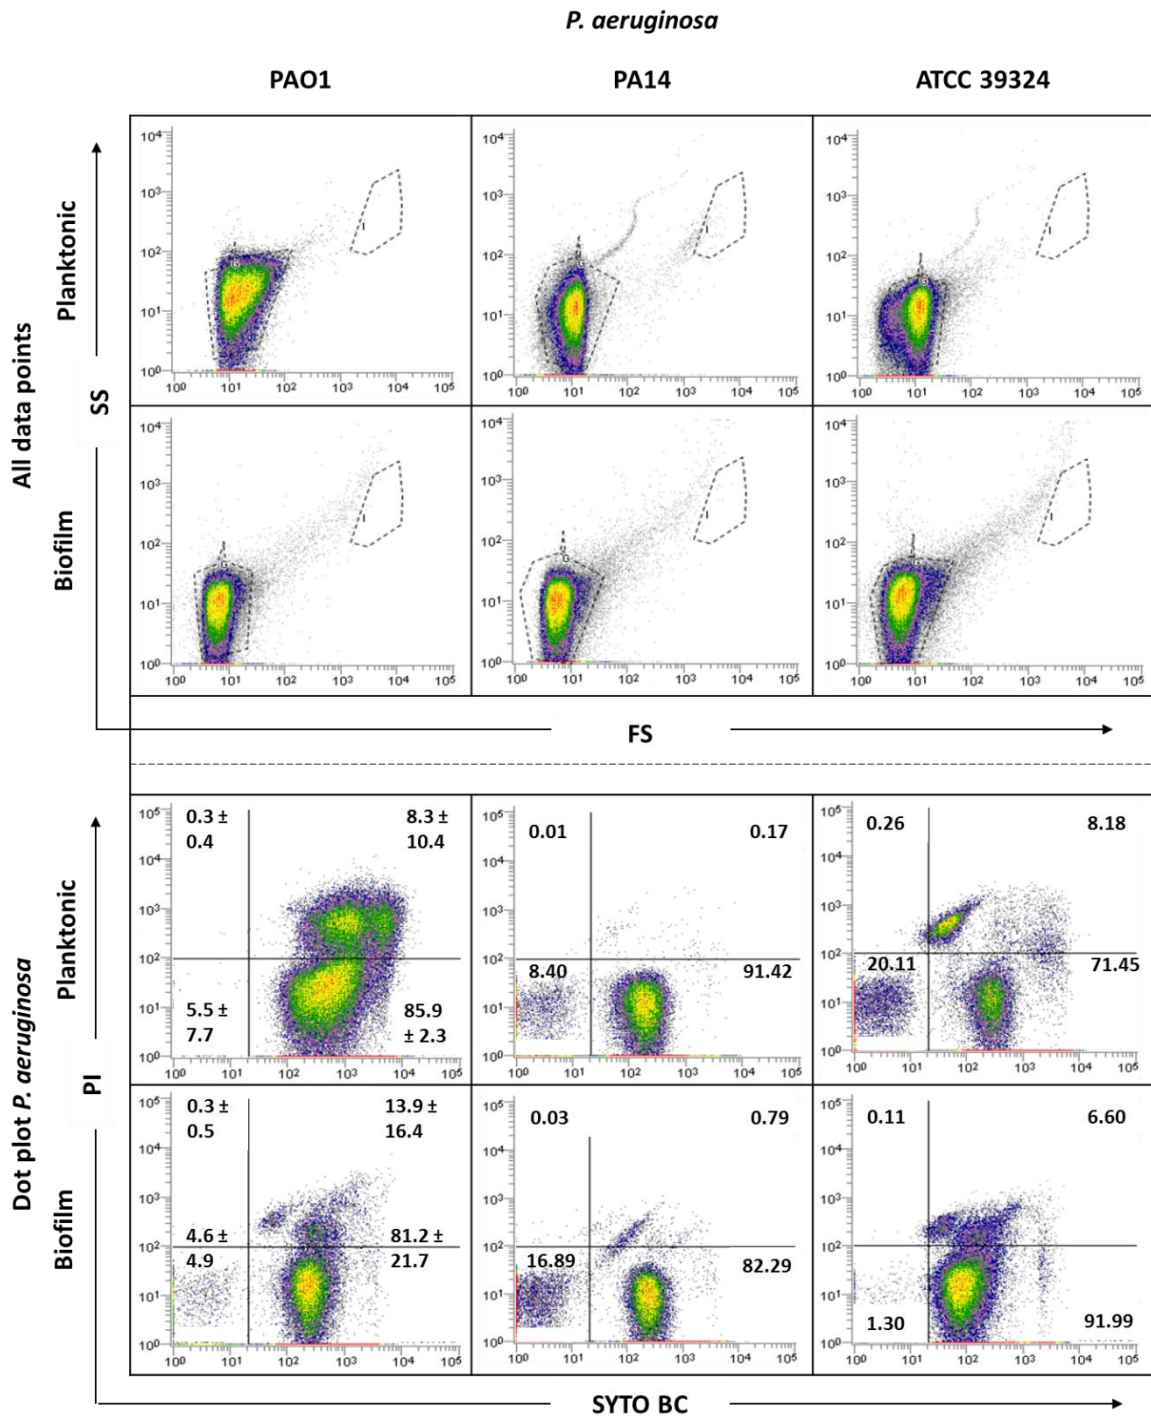

Figure S1. Representative dot plots obtained for planktonic and biofilm cells of *P. aeruginosa*.

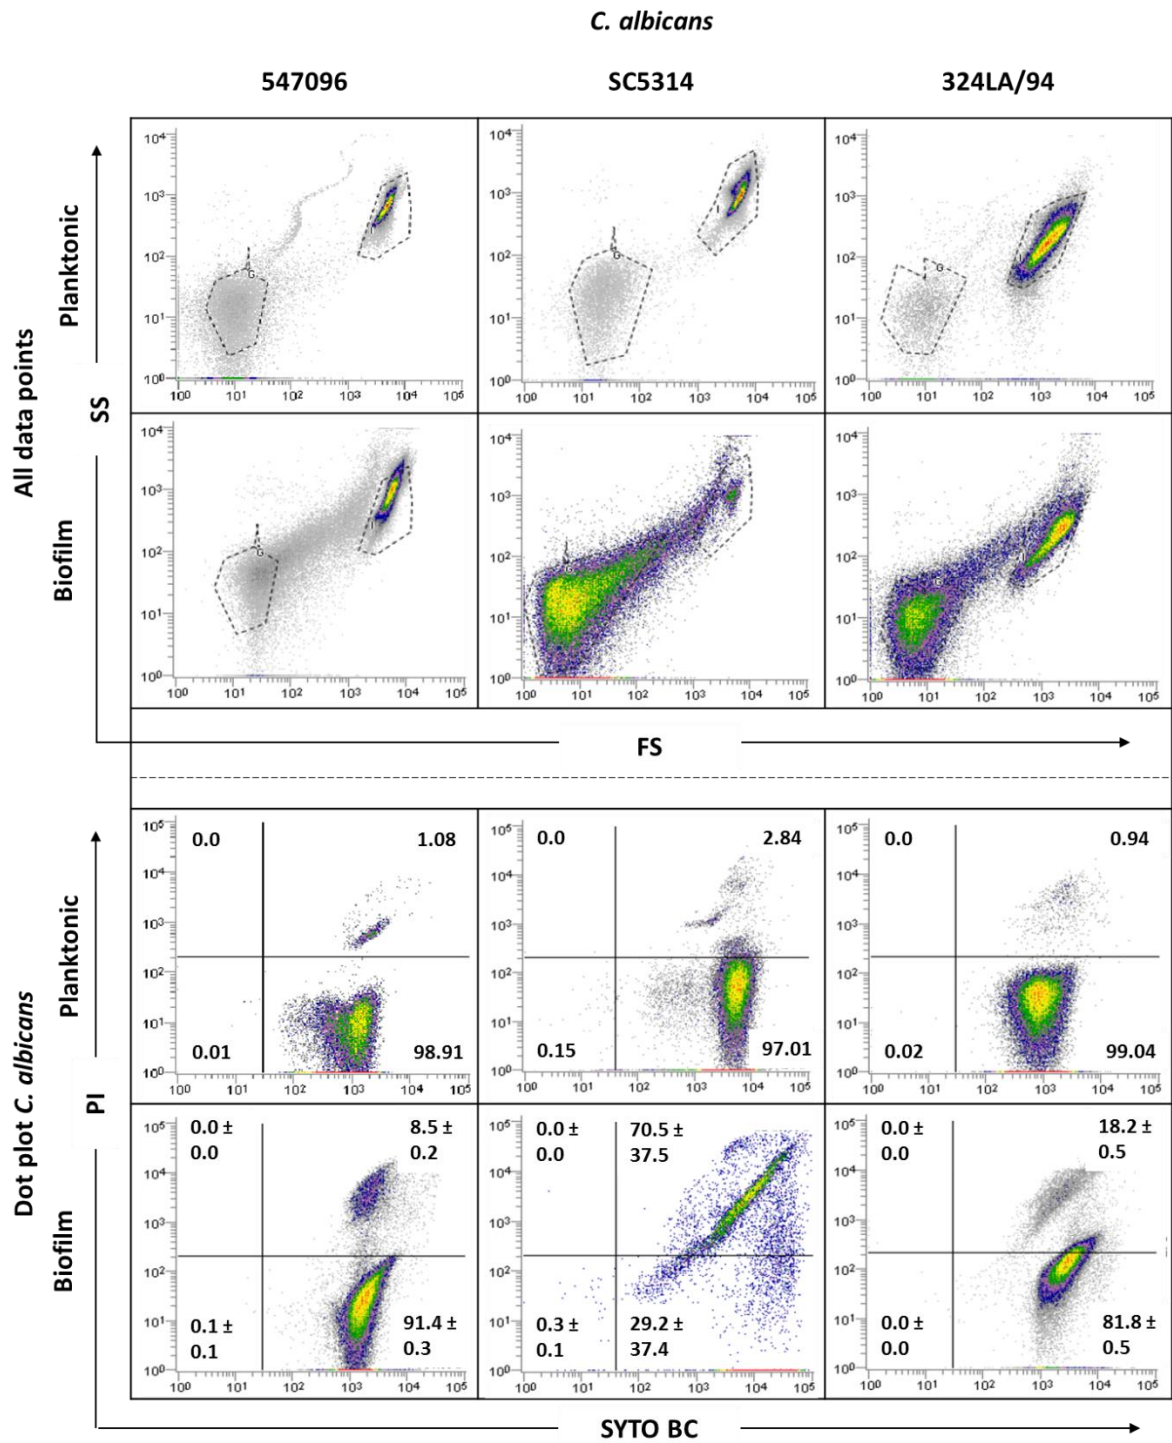

Figure S2. Representative dot plots obtained for planktonic and biofilm cells of *C. albicans*.

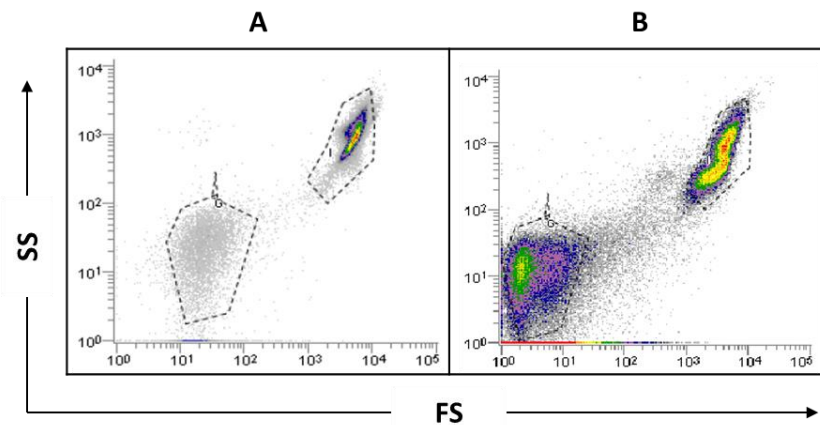

**Figure S3.** Representative dot plots obtained by FCM of planktonic cells of *C. albicans* SC5314 (A) and hyphal growth inducing (B).

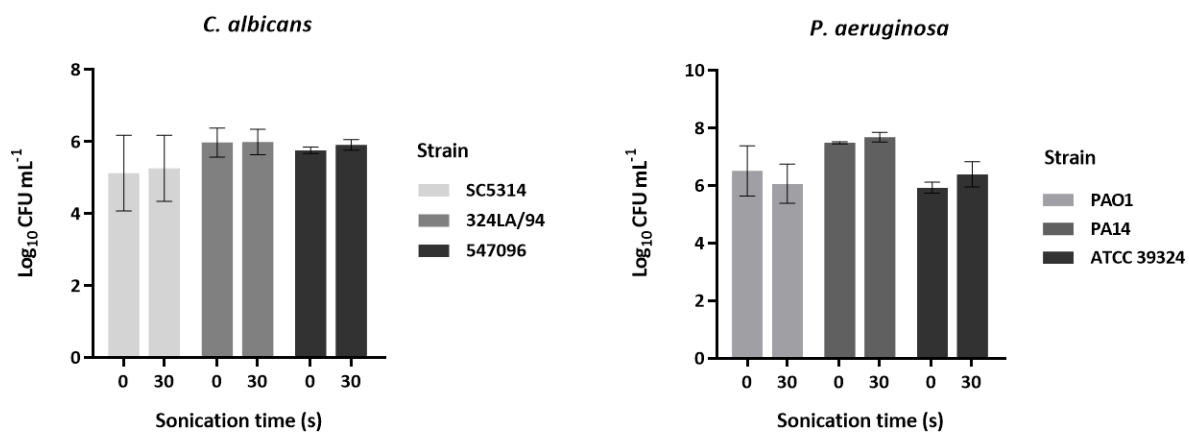

**Figure S4.** Effect of sonication process on biofilm-cells viability. CFU enumeration of *C. albicans* (A) and *P. aeruginosa* (B) biofilms before and after 30 s of sonication at 30 % amplitude.

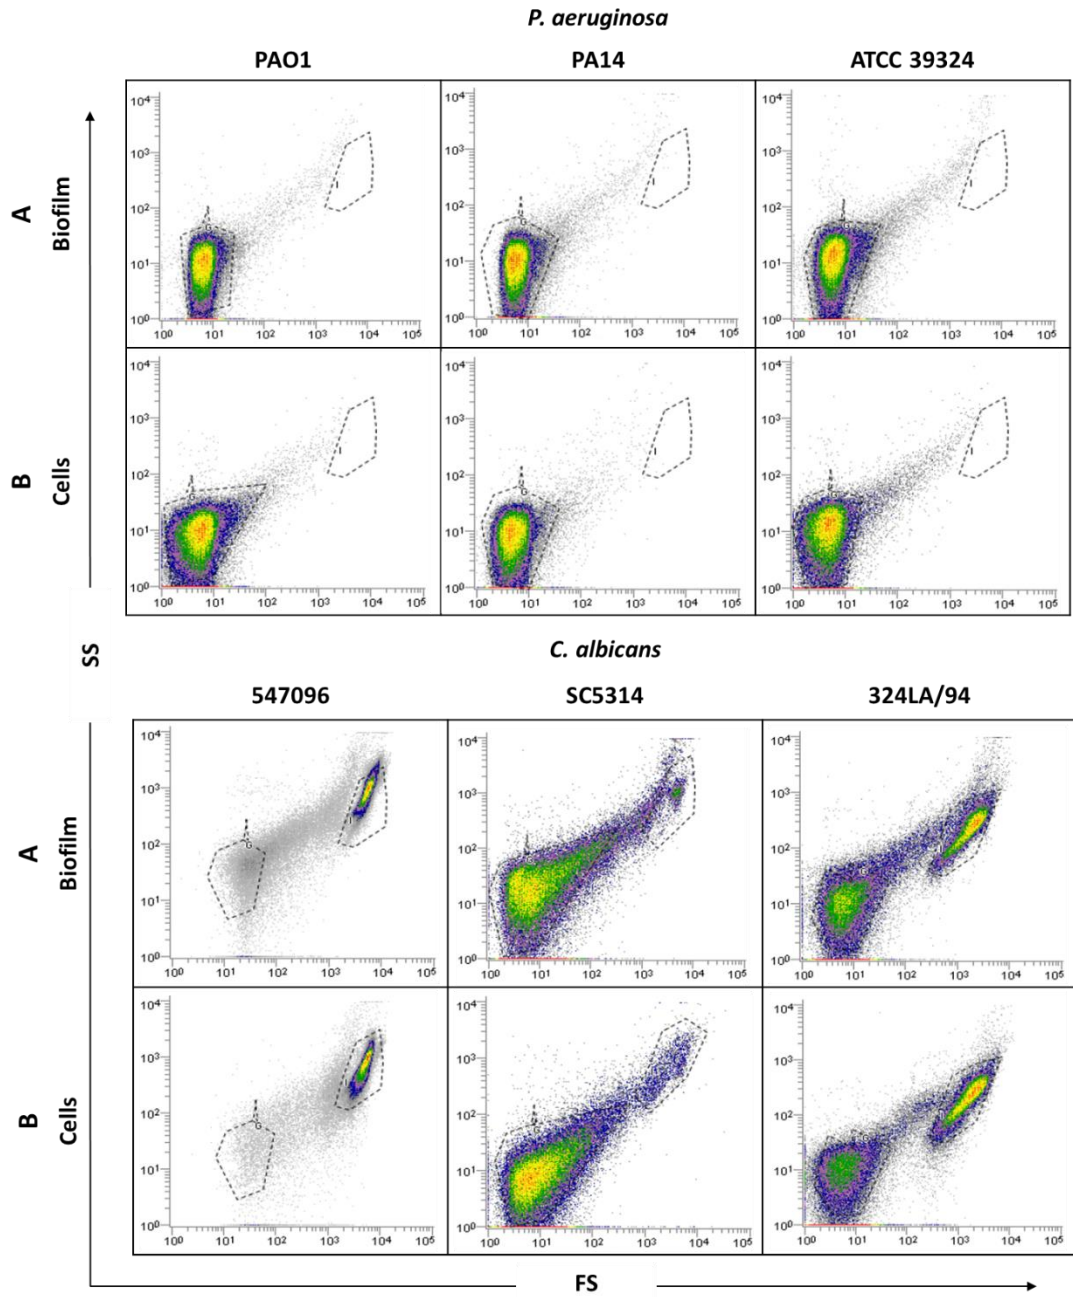

**Figure S5.** Representative dot plots obtained for *P. aeruginosa* and *C. albicans* biofilms (A) and biofilm cells after matrix extraction (B) by FCM.
